# Supplementary material
Source: ML conference proceedings conference paper supplement (https://openaccess.thecvf.com/content/ICCV2023/html/Zhu_3D-VisTA_Pre-trained_Transformer_ICCV_2023_paper.html)
Supplement: Supplementary file 1 [file Zhu_3D-VisTA_Pre-trained_Transformer_ICCV_2023_supplemental.zip]

# Appendix

## A. Implementation Details

### A.1. Downstream Tasks

**ScanRefer** [8]: The ScanRefer dataset contains 51,583 sentences written by humans to describe 800 scenes in ScanNet. We used the official split and allocated 36,665 and 9,508 samples for training and validation, respectively. The dataset is categorized into unique and multiple subsets based on whether the target object is a unique class in the scene. In this task, we need to find the target object described by a sentence. The evaluation metric for this task is accuracy under intersection over union (IoU) 0.25 and 0.5.

**Nr3D/Sr3D** [1]: The Sr3D dataset comprises of 83,572 utterances that are automatically generated using a template that focuses on the target-anchor spatial relationship. The Nr3D contains 45,503 human utterances. Both Sr3D and Nr3D are split by “Easy”/“Hard” and “ViewDep”/“ViewIndep”. Hard samples are the ones with two or more distractors in a scene. The view-dependent samples contain language descriptions that rely on viewing directions. These two datasets are also used for visual grounding like ScanRefer. But grounding accuracy with ground truth object proposal is evaluated in this setting.

**ScanQA** [3]: ScanQA is a dataset for 3D question answering with 41,363 questions and 58,191 answers. Different from 2D QA, ScanQA focuses more on spatial relations. We follow [3] to use exact matches EM@1 and EM@10 as the evaluation metric. EM@K means the percentage of top K answers from the model matches one of the ground-truth answers. Also, we include text similarity metrics to evaluate answers, including BLEU-4, ROUGE, METEOR, and CIDEr.

**SQA3D** [36]: SQA3D is a benchmark for scene understanding of embodied agents with 6.8k unique situations, 20.4k descriptions, and 33.4k diverse reasoning questions. Given a situation, an embodied agent must understand embodied activities, navigation instructions, and common sense, and perform multi-hop reasoning. The evaluation metric is answer accuracy under different types of questions.

### A.2. Model Architecture

For the scene encoder, we use a three-layer Pointnet++ [39] with radius 0.2, 0.4, and sample all points to aggregate a 768-dimension feature. For all text and object tokens, the dimension is 768 in the following multi-modal fusion layers. In the unified encoder, the number of attention heads is set to 12 and the dimension of feedforward layers is set to 2048. For the visual grounding head, we use a two-layer MLP with a hidden dimension of 384. For the question-answering head and the situated reasoning head, we use a two-layer MLP with input dimensions 512 (from

the attention flat layer) and 768.

### A.3. Training settings

The settings of pre-training including mask ratio, and optimization hyperparameters are introduced in the main paper. In this part, we elaborate on the fine-tuning details.

**3D Visual Grounding:** We only use a cross-entropy loss for fine-tuning 3D-VisTA on ScanRefer, Nr3D, and Sr3D. For all these grounding tasks, we set the batch size to 64, and the learning rate to 1e-4. We multiply the learning rate of the text encoder by 0.1 to stabilize the training process. We fine-tune the pre-trained 3D-VisTA for 100, 100, and 50 epochs for ScanRefer, Nr3D, and Sr3D, respectively. AdamW with  $\beta_1 = 0.9, \beta_2 = 0.98$  is chosen as the optimizer. We use a warmup of 5,000 steps and a cosine annealing learning rate schedule.

**3D Question Answering:** We use a cross-entropy answer classification loss and a visual grounding loss for ScanQA. The batch size is 64 and the learning rate is 1e-4. 3D-VisTA is fine-tuned for 30 epochs with 2000 warmup steps for this task. Other optimization parameters are the same as the visual grounding task.

**3D Situated Reasoning:** Answer classification loss is used for SQA3D. We fine-tune 3D-VisTA for 50 epochs. Other optimization parameters are the same as the 3D question-answering task.

### A.4. ScanScribe

In the main paper, we introduce our method of generating new scene-text pairs from scene graphs and large language models. More examples and cases are provided in this section. We support 40 relations and the mapping of relations to descriptions for the template-based generation is shown in Table A1.

With these relations, we can use templates like “This is a object, a neighbor is relation to object” and utilize GPT-3 to increase text diversity. During pre-training, to balance the proportion of template and GPT-3 generated texts in the 3R-Scan dataset, we duplicate texts from GPT-3 to 15 times for pre-training. Examples from both template-based generation and GPT-3 are presented in Fig. A1. We can observe that given entities and relations in a scene, GPT-3 can summarize them into a fluent and natural sentence.

## B. Additional Results

We provide ablation studies on the use the template-generated text and GPT-3-generated text. As shown in Table A2, GPT-3-generated text improves Sr3D and Nr3D by 1.0% and 1.5%, while having little impact on ScanRefer and ScanQA. More qualitative results including failure cases are provided in Fig. A2.

|       |                                                                                                                                                                                                                                                                        |                                                                                                                                                                            |                                                                                                                                                                                                                     |                                                                                                                                                                                                                                            |
|-------|------------------------------------------------------------------------------------------------------------------------------------------------------------------------------------------------------------------------------------------------------------------------|----------------------------------------------------------------------------------------------------------------------------------------------------------------------------|---------------------------------------------------------------------------------------------------------------------------------------------------------------------------------------------------------------------|--------------------------------------------------------------------------------------------------------------------------------------------------------------------------------------------------------------------------------------------|
| Scene | 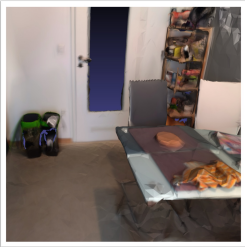                                                                                                                                                                                      |                                                                                           |                                                                                                                                   |                                                                                                                                                         |
|       | <p>The trash can is behind another trash can, and it's located on the left side of a kitchen cabinet, a white chair, and a box. On the right side, there is a rack and a shoe.</p>                                                                                     | <p>The stove is attached to the kitchen cabinet and is positioned on the left side of the sink. It's also located in front of both the kettle and the toaster.</p>         | <p>The coffee table is on the right side of the TV stand and close to the gray sofa. It is also on the right side of the stool.</p>                                                                                 | <p>The chair is on the left side of the blue bed, close by the table. It's on the right side of the cabinet and the box, and behind the light. Additionally, there's another chair on its left.</p>                                        |
|       | <p>This is a trash can. It is behind the another trash can. It is on the left side of the kitchen cabinet. It is on the left side of the white chair. It is on the left side of the box. It is on the right side of the rack. It is on the right side of the shoe.</p> | <p>This is a stove. It is attached to the kitchen cabinet and is positioned on the left side of the sink. It is in front of the kettle. It is in front of the toaster.</p> | <p>This is a coffee table. It is close by the gray sofa. It is on the right side of the tv stand. It is on the right side of the stool.</p>                                                                         | <p>This is a chair. It is on the left side of the blue bed. It is close by the table. It is on the right side of the cabinet. It is on the right side of the box. It is behind the light. It is on the left side of the another chair.</p> |
|       |                                                                                                                                                                                                                                                                        |                                                                                                                                                                            |                                                                                                                                                                                                                     |                                                                                                                                                                                                                                            |
| Scene |                                                                                                                                                                                     |                                                                                         |                                                                                                                                 |                                                                                                                                                       |
|       | <p>The doorframe is on the right side of the counter and on the left side of the toilet.</p>                                                                                                                                                                           | <p>The purple curtain is near the rectangular brown window and another purple curtain</p>                                                                                  | <p>The rectangular black TV is standing on the brown TV stand. It is in front of the gray sofa and on the right side of the brown chair.</p>                                                                        | <p>The brown rocking chair is on the left side of the brown chair, in front of the rectangular white fireplace, on the left side of the square brown box, and on the right side of the green plant.</p>                                    |
|       | <p>This is a doorframe. It is on the left side of the toilet.</p>                                                                                                                                                                                                      | <p>This is a purple curtain. It is close by the rectangular brown window. It is close by the another purple curtain.</p>                                                   | <p>This is a rectangular black tv. It is standing on the brown tv stand. It has the same state as the rectangular white fireplace. It has the same color as the black pillow. It is darker than the white lamp.</p> | <p>This is a brown rocking chair. It is on the left side of the brown chair. It is on the left side of the rectangular white fireplace. It is on the left side of the square brown box. It is on the right side of the green plant</p>     |
|       |                                                                                                                                                                                                                                                                        |                                                                                                                                                                            |                                                                                                                                                                                                                     |                                                                                                                                                                                                                                            |

Figure A1: Examples of both template and GPT-3 generated text in ScanScribe dataset. GPT-3 generated text is more natural than template-generated text.

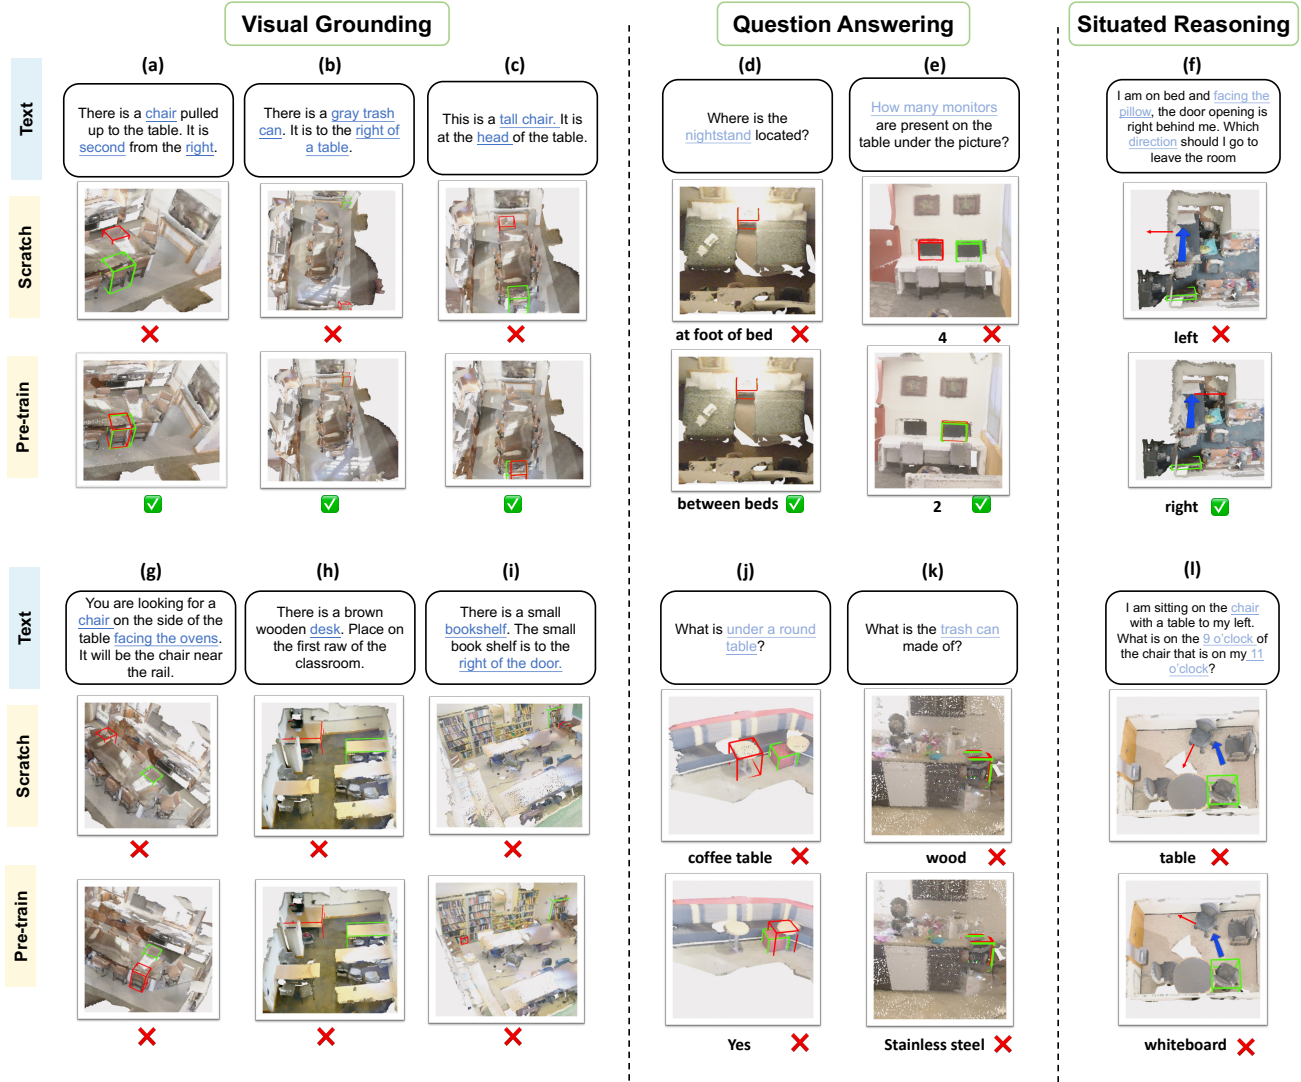

Figure A2: Qualitative results on ScanRefer, ScanQA, and SQA3D. Green and red denote the ground-truth and predicted object boxes, respectively. As shown in (a,b,c,d,e,f), the pre-trained 3D-VisTA shows advantages in spatial reasoning, concept grounding, and situation understanding. In spite of these advantages, (g, h, j) indicate that for some complicated cases with spatial relations, the pre-trained model still cannot understand them. (i, k) show that our model is still limited by the semantic information extracted by point clouds, which fail to locate the right object or understand texture. From (l), we can observe that our model may fail in the case requiring complex multi-hop reasoning.

Table A1: The mapping of relations to descriptions.

| Relation              | Description                     |
|-----------------------|---------------------------------|
| supported by          | is supported by the             |
| left                  | is on the left side of the      |
| right                 | is on the right side of the     |
| front                 | is in front of the              |
| behind                | is behind the                   |
| close by              | is close by the                 |
| inside                | is inside the                   |
| bigger than           | is bigger than the              |
| smaller than          | is smaller than the             |
| higher than           | is higher than the              |
| lower than            | is lower than the               |
| same symmetry as      | has the same symmetry as the    |
| same as               | is the same as the              |
| attached to           | is attached to the              |
| standing on           | is standing on the              |
| lying on              | is lying on the                 |
| hanging on            | is hanging on the               |
| connected to          | is connected to the             |
| leaning against       | is leaning against the          |
| part of               | is part of the                  |
| belonging to          | is belonging to the             |
| built in              | is built in the                 |
| standing in           | is standing in the              |
| covers                | covers the                      |
| lying in              | is lying in the                 |
| hanging in            | is hanging in the               |
| same color            | has the same color as the       |
| same material         | has the same material as the    |
| same texture          | has the same texture as the     |
| same shape            | has the same shape as the       |
| same state            | has the same state as the       |
| same object type      | has the same object type as the |
| messier than          | is messier than the             |
| cleaner than          | is cleaner than the             |
| fuller than           | is fuller than the              |
| more closed           | is more closed to the           |
| more open             | is more open than the           |
| brighter than         | is brighter than the            |
| darker than           | is darker than the              |
| more comfortable than | is more comfortable than the    |

Table A2: Ablation studies on the template and GPT-3 generated text from 3R-Scan. We report the results on ScanRefer, Sr3D, Nr3D and ScanQA.

| Template | GPT-3 | ScanRefer | Sr3D | Nr3D | ScanQA |
|----------|-------|-----------|------|------|--------|
| ✓        | ×     | 57.4      | 75.4 | 62.7 | 23.7   |
| ✓        | ✓     | 57.4      | 76.4 | 64.2 | 23.8   |
